# Supplementary material for: Integrated analysis of genome-wide miRNAs and targeted gene expression in esophageal squamous cell carcinoma (ESCC) and relation to prognosis
Source: PubMed Central journal article supplement (PMC7201714; doi:10.1186/s12885-020-06901-6), 2020-05-06

# Suppl Fig S 2

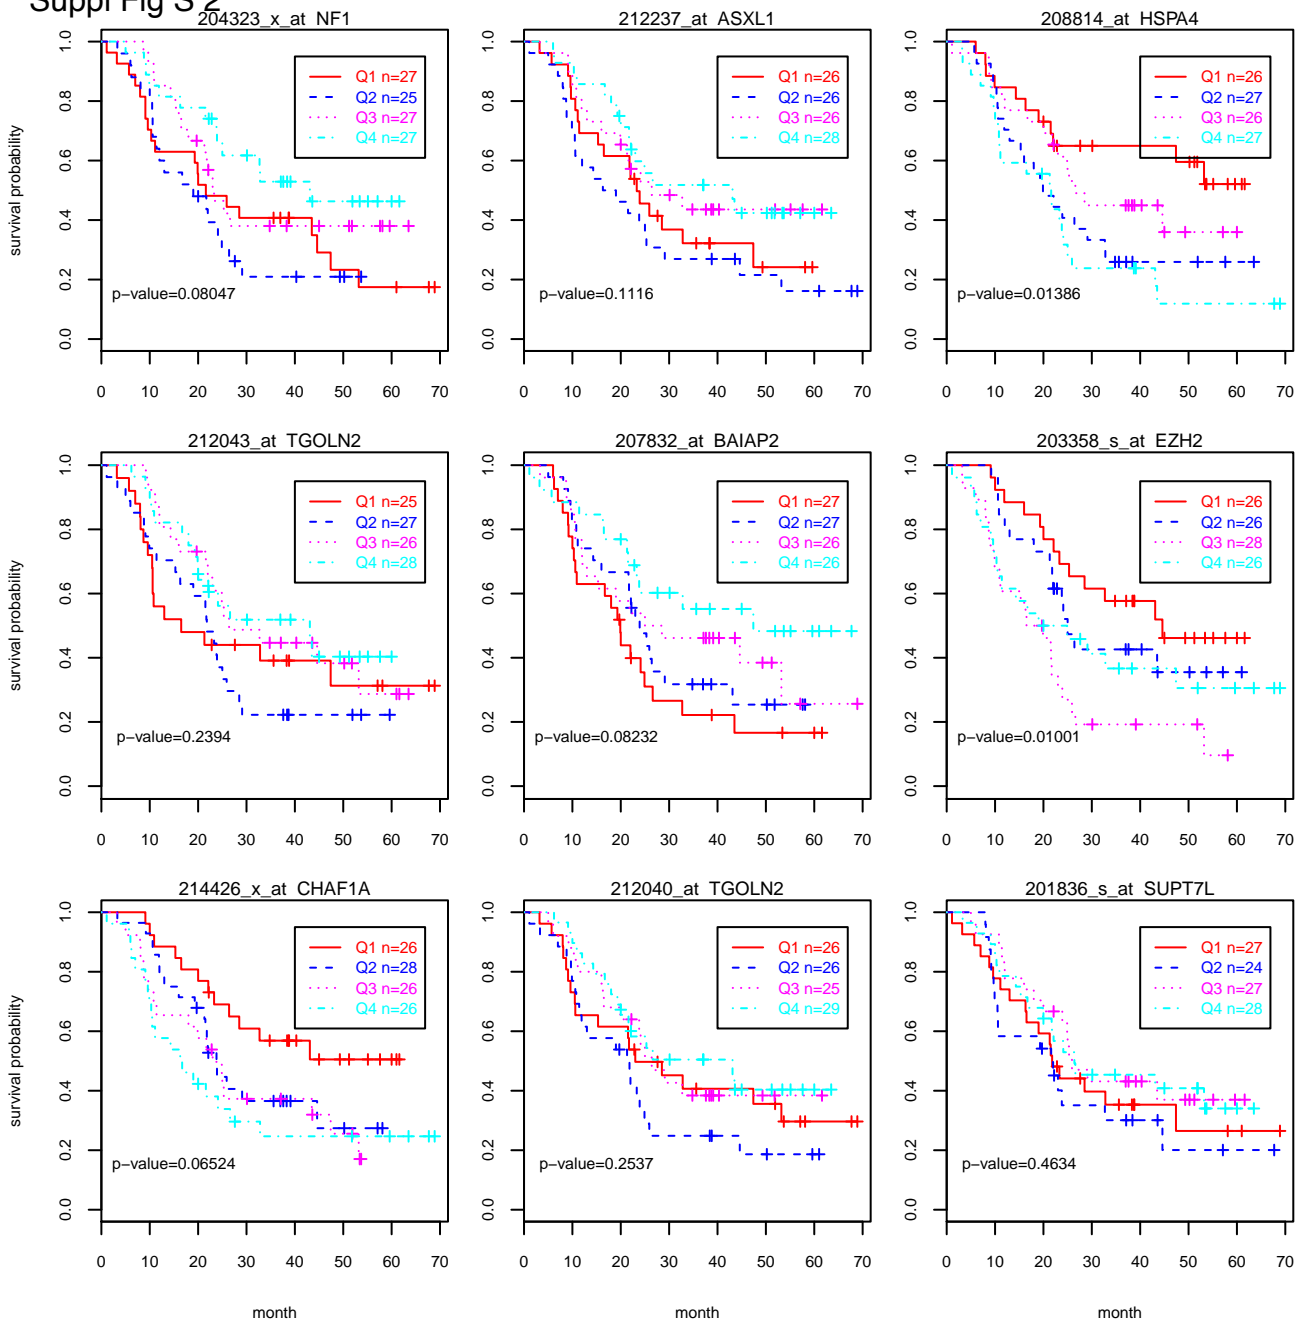

Supplement: 12885_2020_6901_MOESM8_ESM.pdf [file 12885_2020_6901_MOESM8_ESM.pdf]
